# Supplementary figures and images for: Insulin regulates POMC neuronal plasticity to control glucose metabolism
Source: eLife journal article supplement (doi:10.7554/elife.38704), 2018-09-19

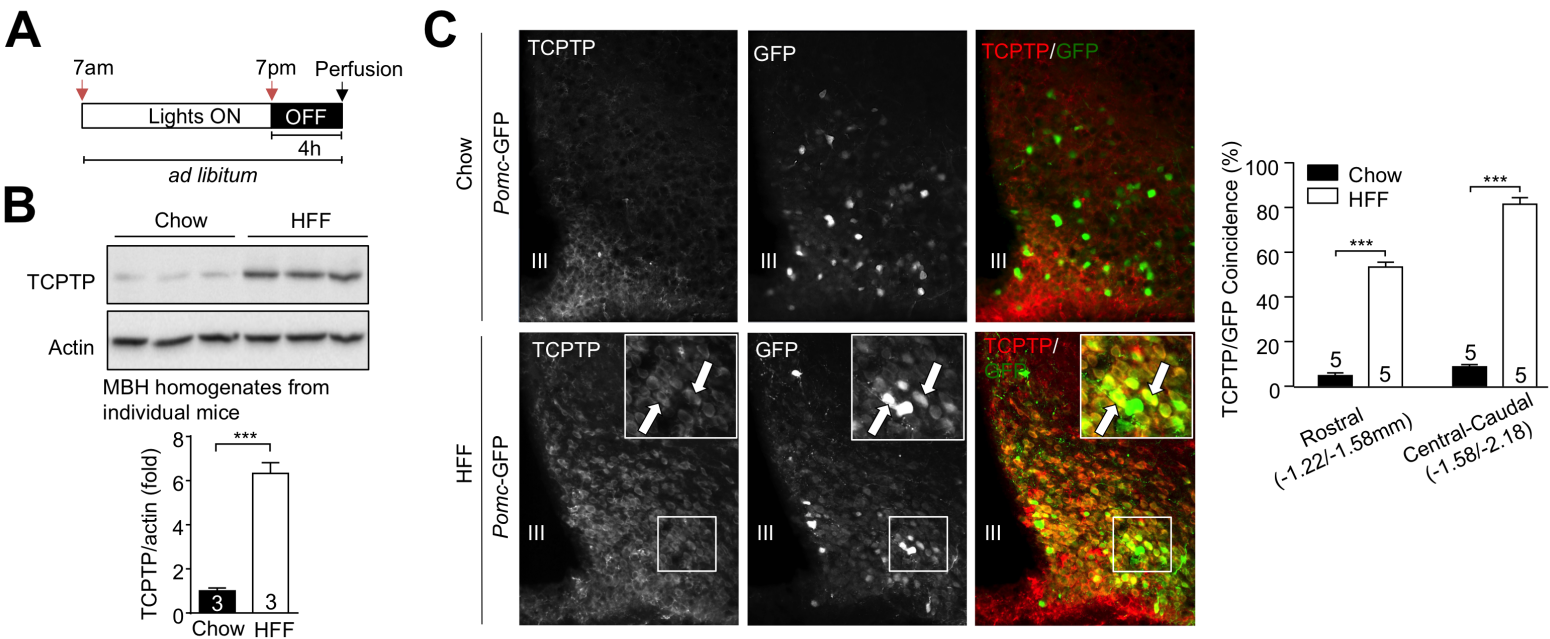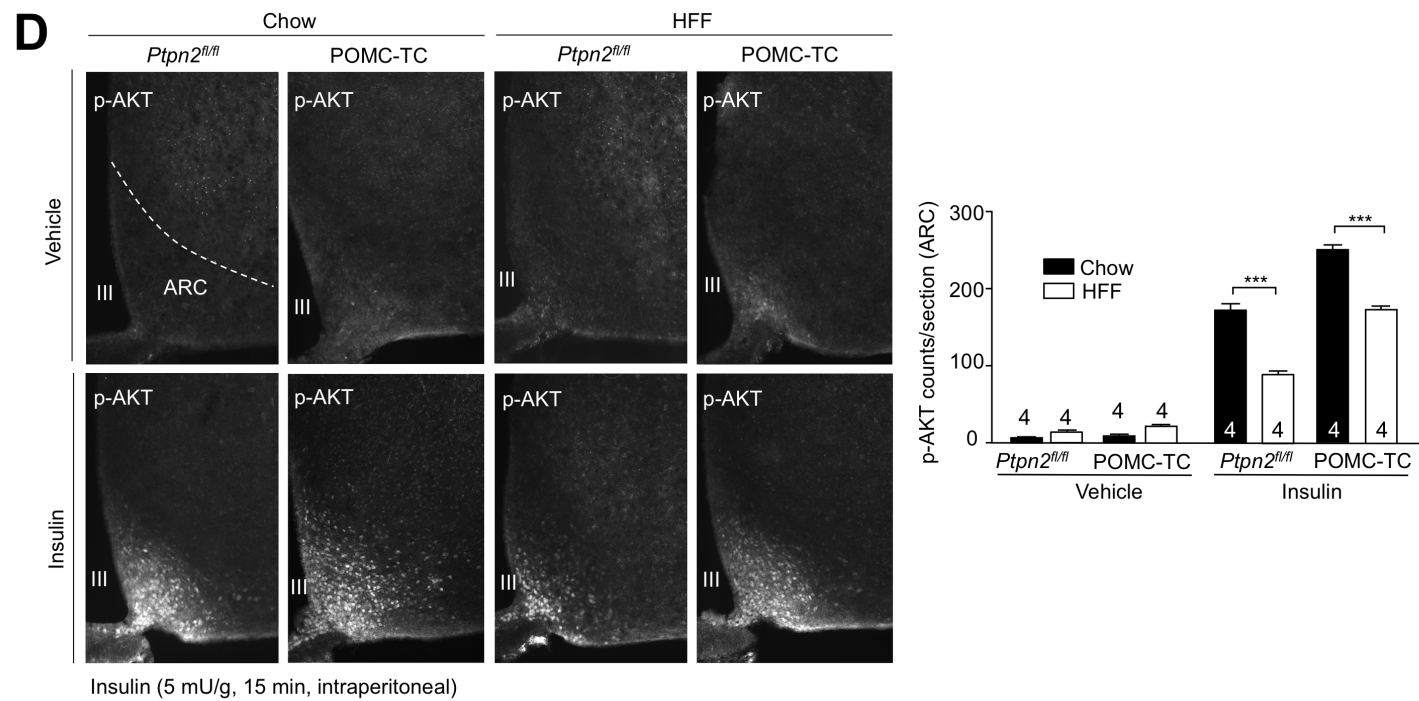

Supplement: supp [file elife_poa_e38704_Figure_1_figure_supplement_1.pdf › elife_poa_e38704_Figure_1_figure_supplement_1.pdf]

**A**

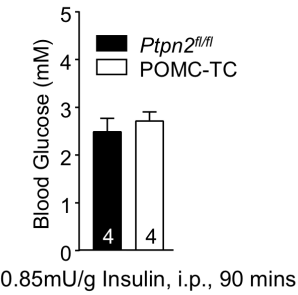

Supplement: supp [file elife_poa_e38704_Figure_1_figure_supplement_2.pdf › elife_poa_e38704_Figure_1_figure_supplement_2.pdf]

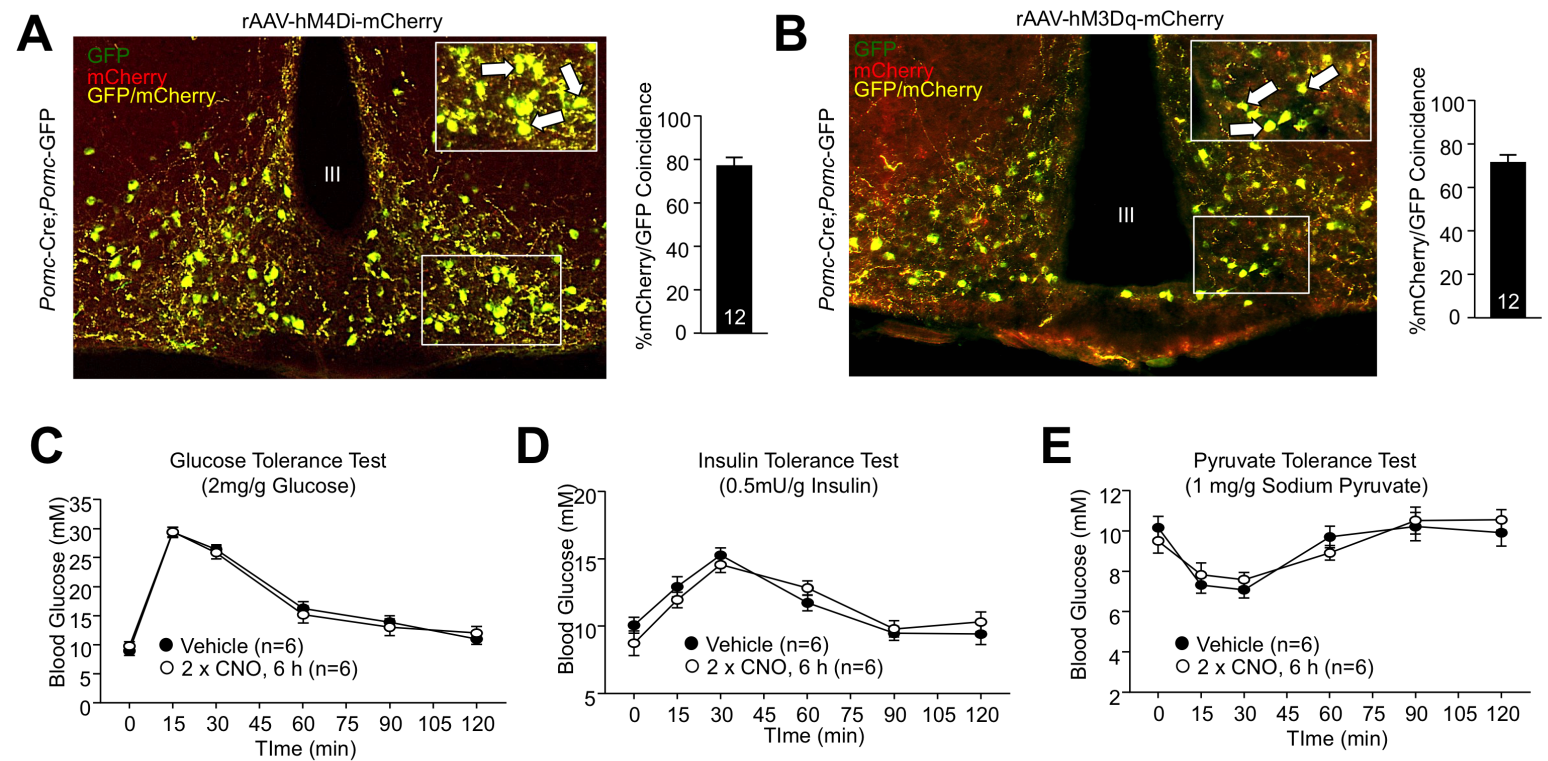

Supplement: supp [file elife_poa_e38704_Figure_2_figure_supplement_1.pdf › elife_poa_e38704_Figure_2_figure_supplement_1.pdf]

A

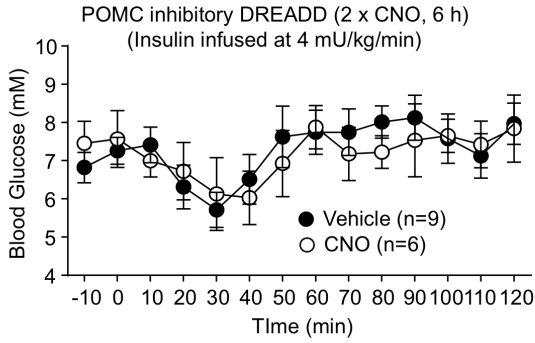

Supplement: supp [file elife_poa_e38704_Figure_2_figure_supplement_2.pdf › elife_poa_e38704_Figure_2_figure_supplement_2.pdf]

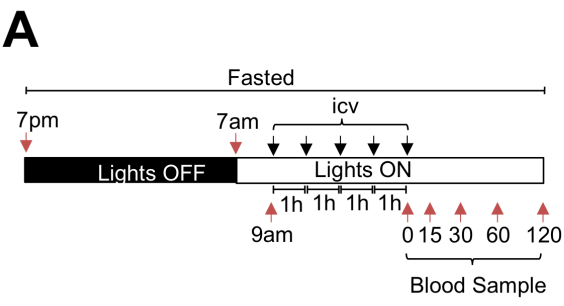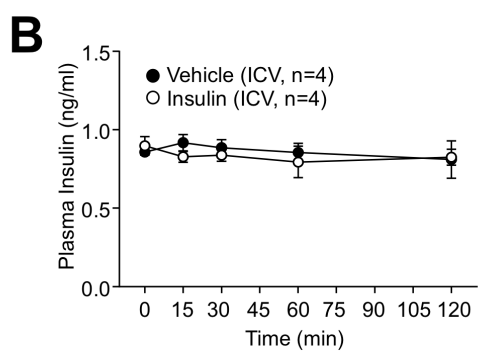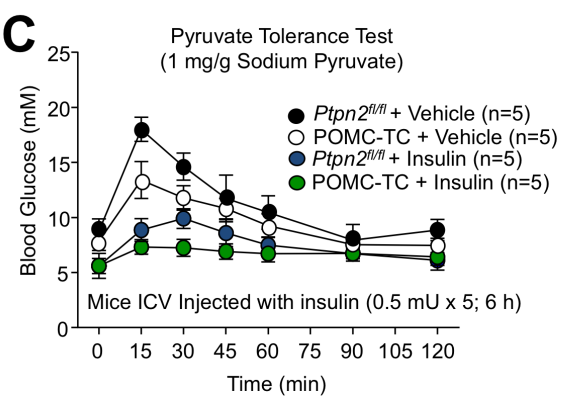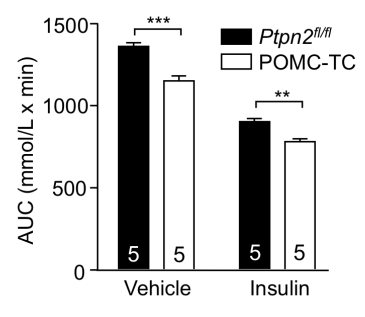

Supplement: supp [file elife_poa_e38704_Figure_3_figure_supplement_1.pdf › elife_poa_e38704_Figure_3_figure_supplement_1.pdf]

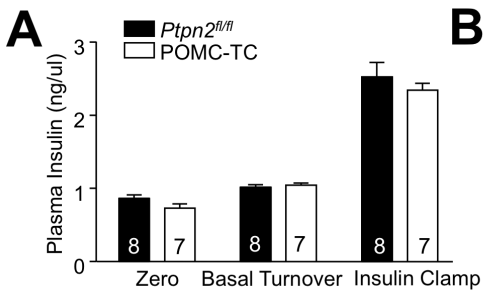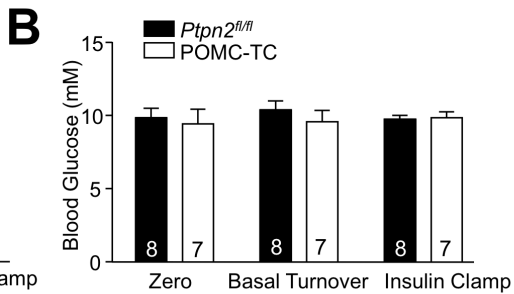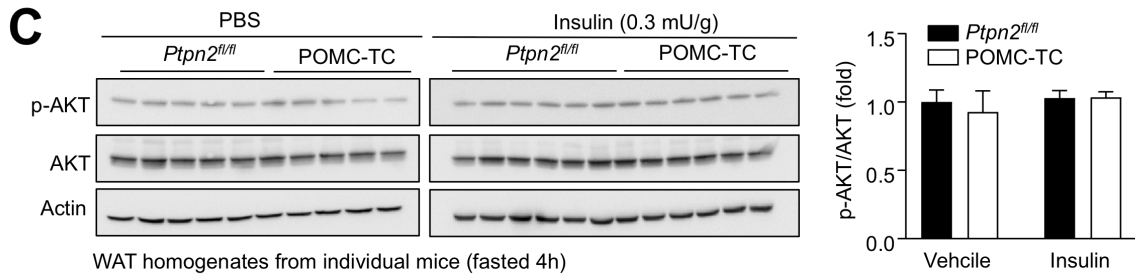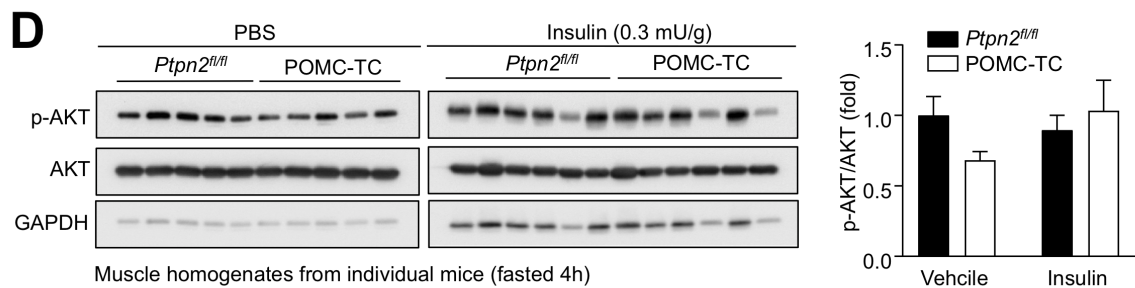

Supplement: supp [file elife_poa_e38704_Figure_4_figure_supplement_1.pdf › elife_poa_e38704_Figure_4_figure_supplement_1.pdf]

A

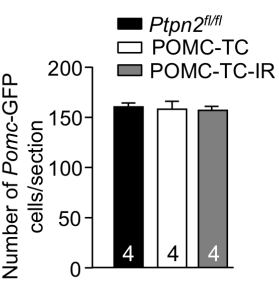

Supplement: supp [file elife_poa_e38704_Figure_6_figure_supplement_1.pdf › elife_poa_e38704_Figure_6_figure_supplement_1.pdf]

**A**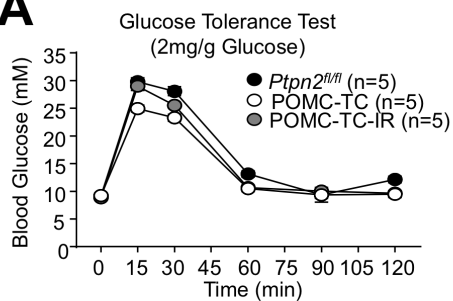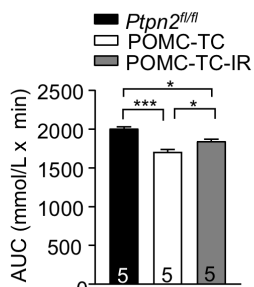**B**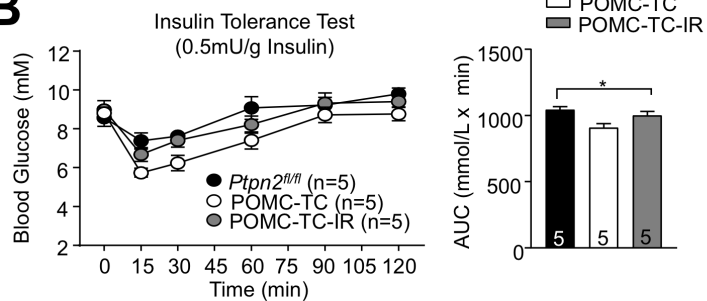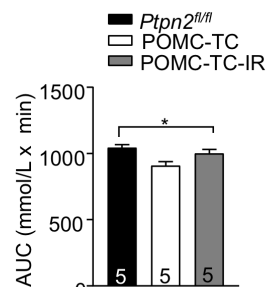**C**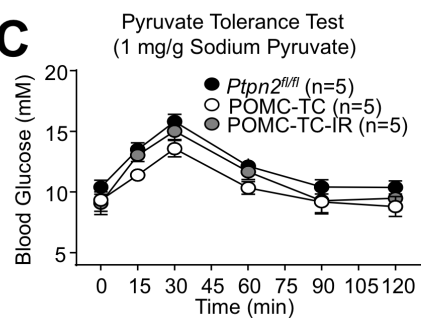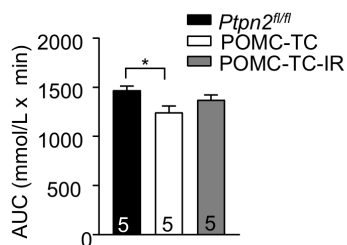**D**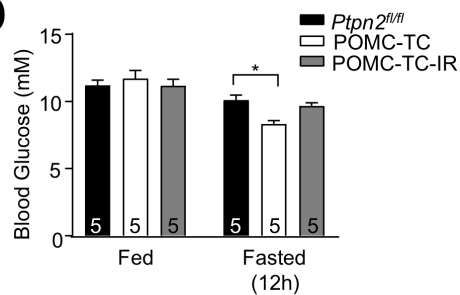

Supplement: supp [file elife_poa_e38704_Figure_6_figure_supplement_2.pdf › elife_poa_e38704_Figure_6_figure_supplement_2.pdf]

**A**

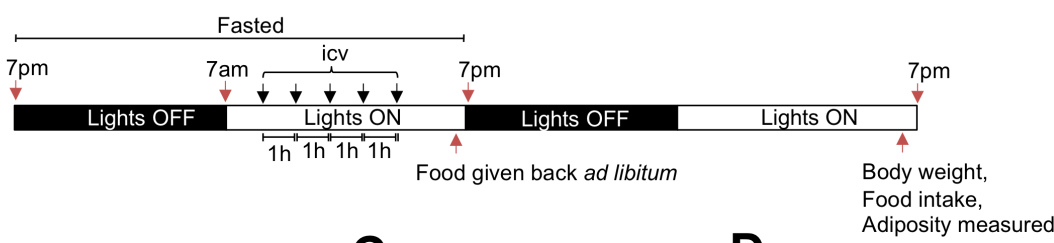

**B**

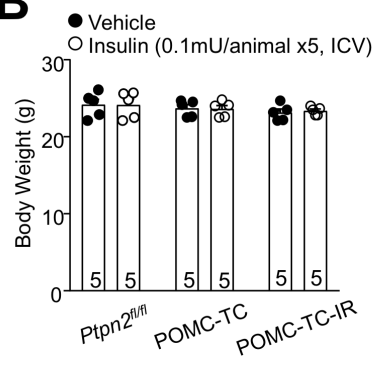

**C**

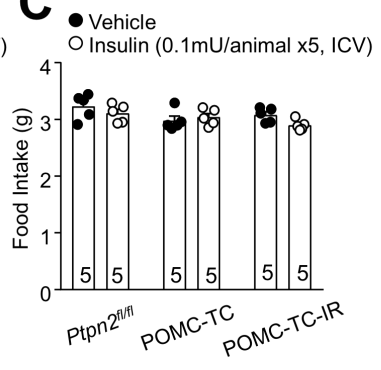

**D**

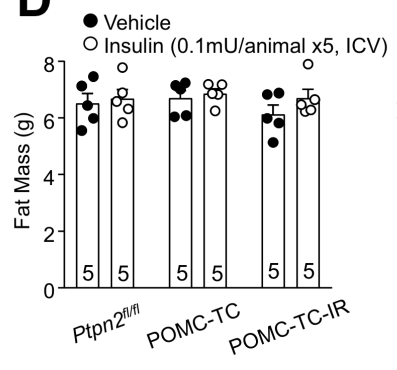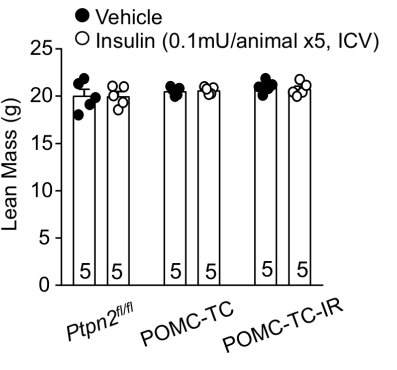

Supplement: supp [file elife_poa_e38704_Figure_6_figure_supplement_3.pdf › elife_poa_e38704_Figure_6_figure_supplement_3.pdf]

**A**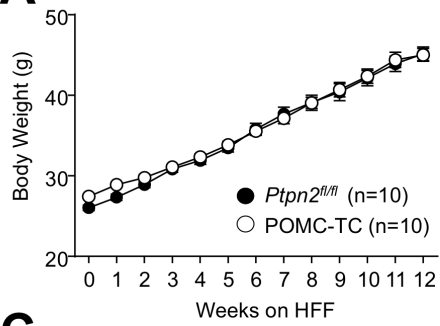**B**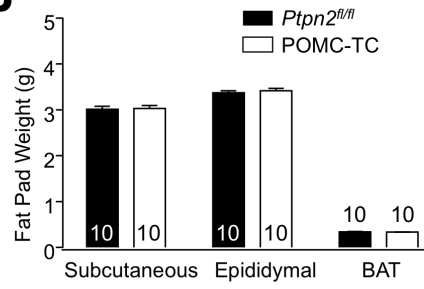**C**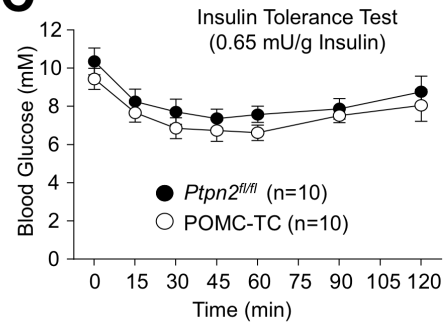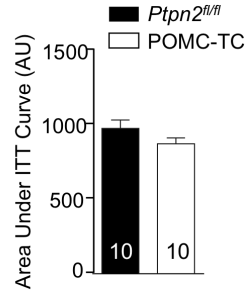**D**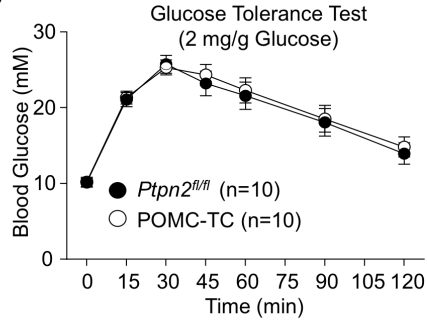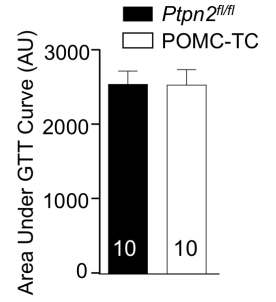**E**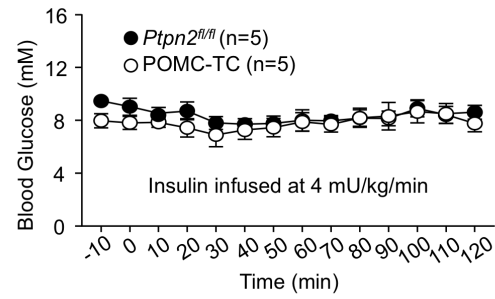

Supplement: supp [file elife_poa_e38704_Figure_7_figure_supplement_1.pdf › elife_poa_e38704_Figure_7_figure_supplement_1.pdf]
